# Supplementary material for: Thermodynamics-Based Models of Transcriptional Regulation by Enhancers: The Roles of Synergistic Activation, Cooperative Binding and Short-Range Repression
Source: PubMed Central journal article supplement (PMC2940721; doi:10.1371/journal.pcbi.1000935), 2010-09-16

**A****Cooperative Binding Model**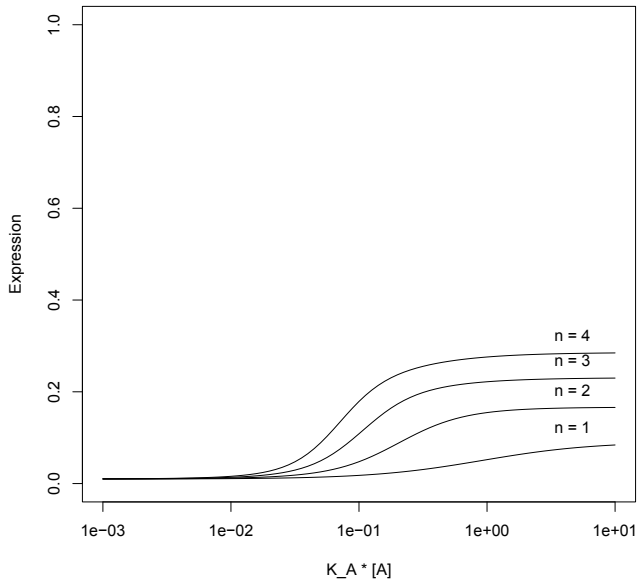**B****Multiplicative Activation Model**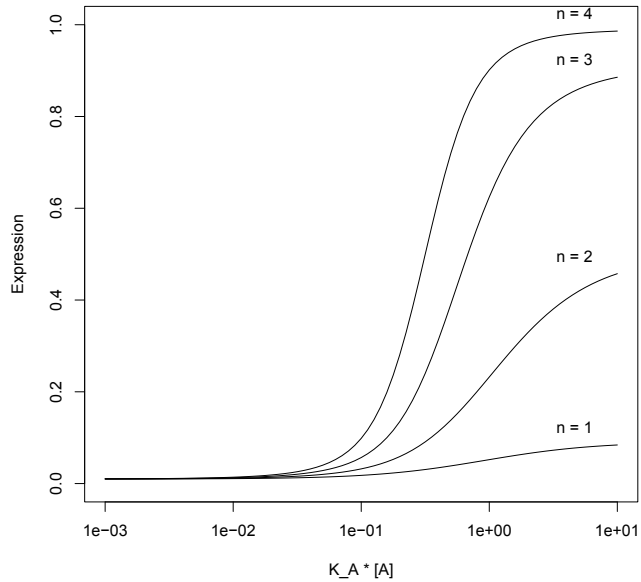

Supplement: pcbi.1000935.s001.pdf [file pcbi.1000935.s001.pdf]
