# Supplementary material for: Thermodynamics-Based Models of Transcriptional Regulation by Enhancers: The Roles of Synergistic Activation, Cooperative Binding and Short-Range Repression
Source: PubMed Central journal article supplement (PMC2940721; doi:10.1371/journal.pcbi.1000935), 2010-09-16

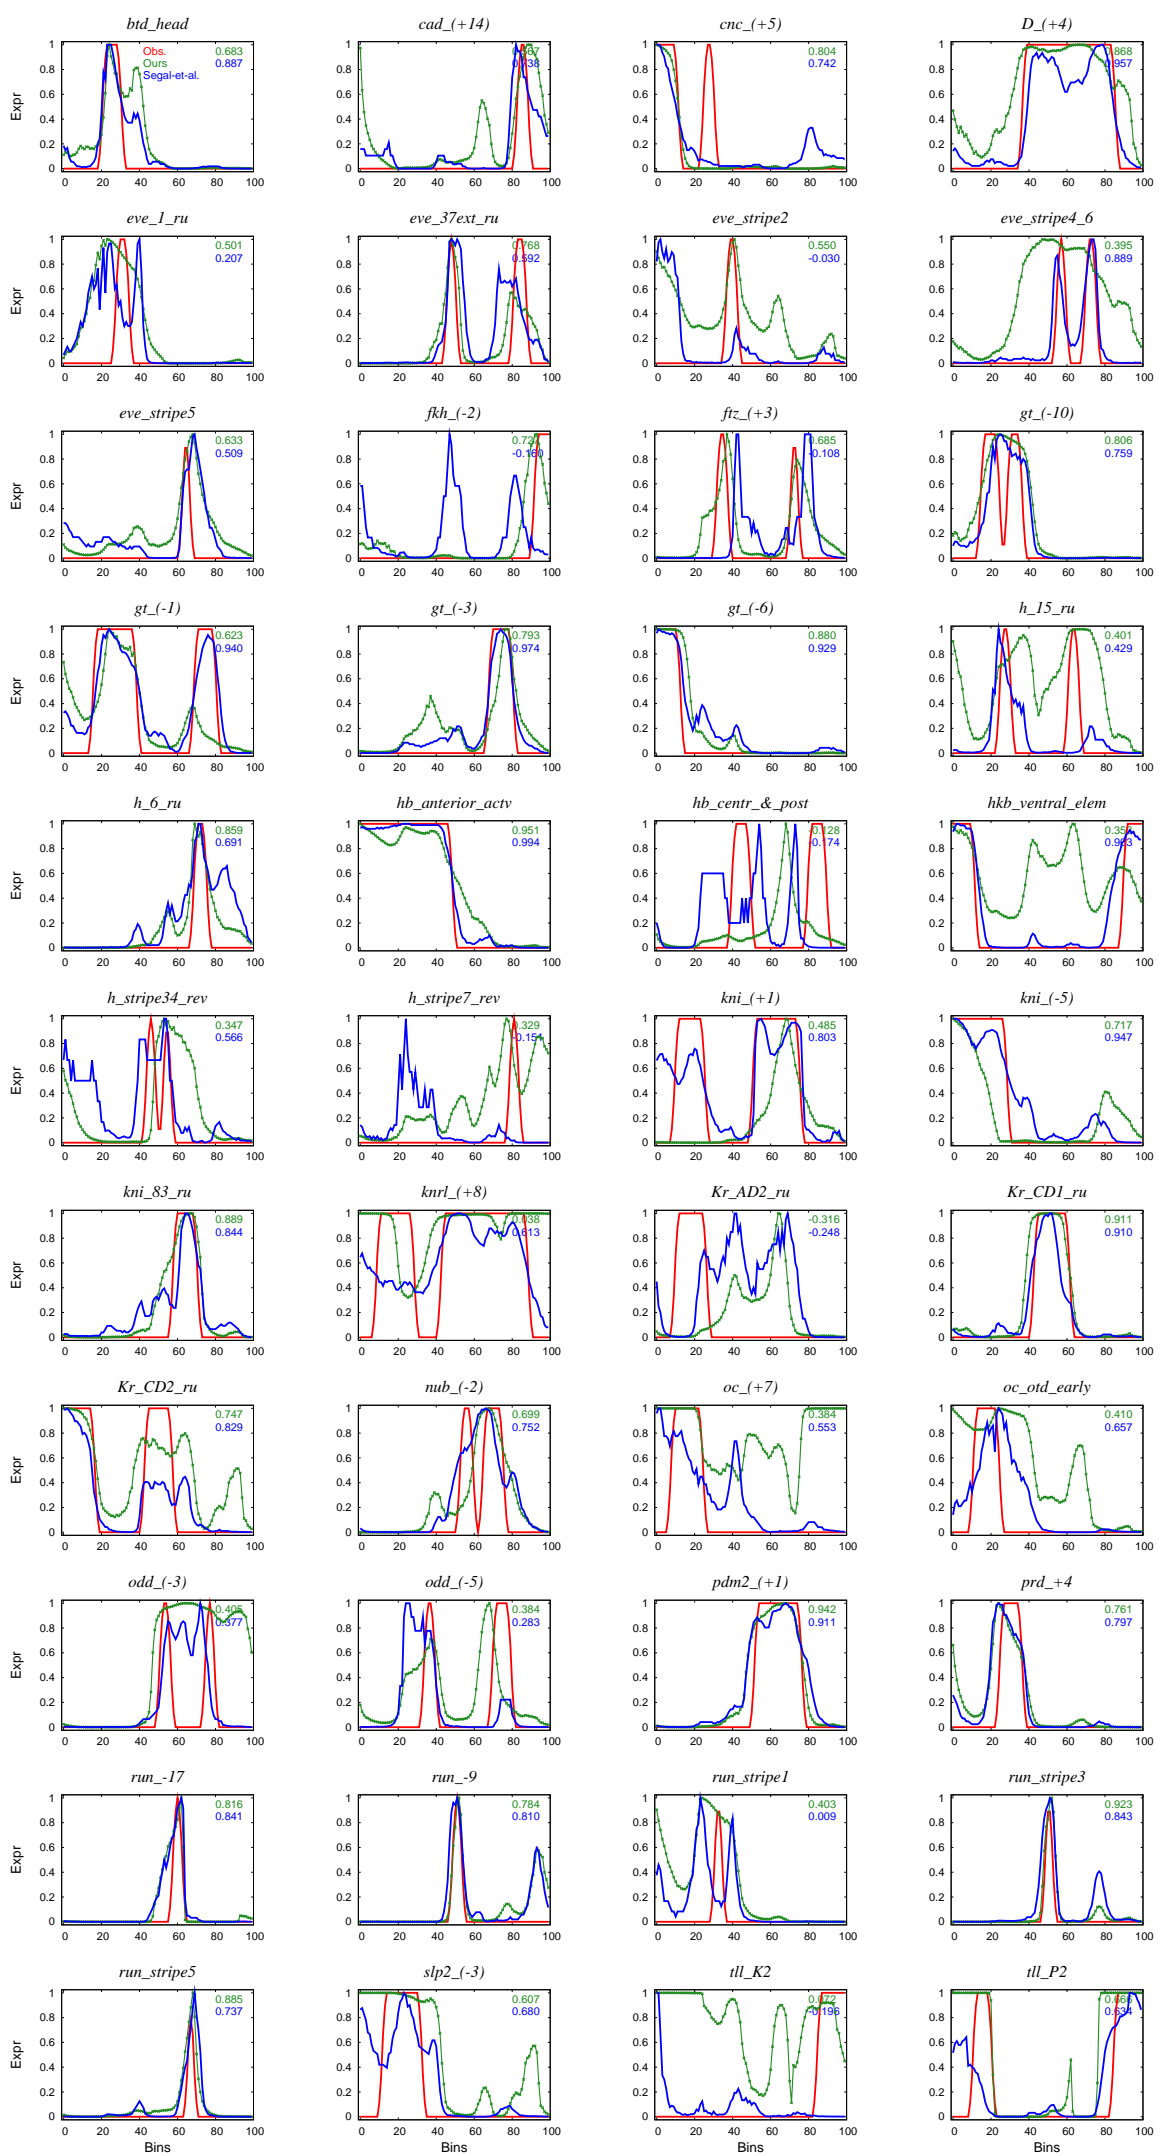

Supplement: pcbi.1000935.s003.pdf [file pcbi.1000935.s003.pdf]
