# Supplementary material for: Thermodynamics-Based Models of Transcriptional Regulation by Enhancers: The Roles of Synergistic Activation, Cooperative Binding and Short-Range Repression
Source: PubMed Central journal article supplement (PMC2940721; doi:10.1371/journal.pcbi.1000935), 2010-09-16

*eve\_stripe5*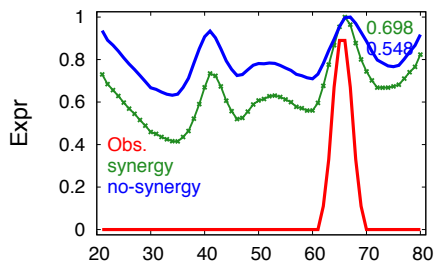*kni\_(-5)*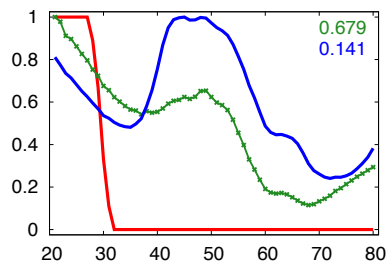*oc\_(+7)*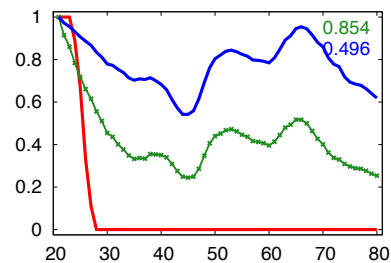*oc\_otd\_early*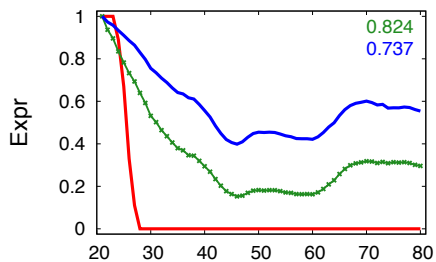*odd\_(-3)*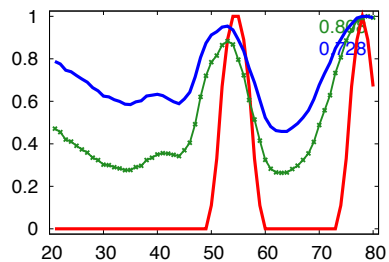*slp2\_(-3)*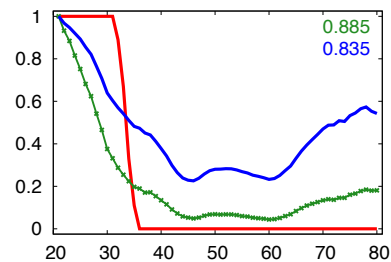*D\_(+4)*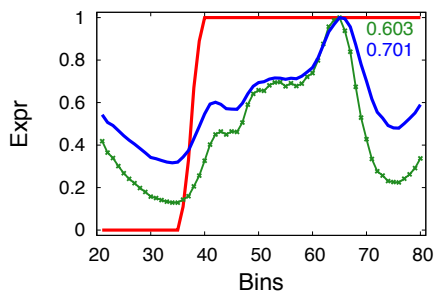*gt\_(-3)*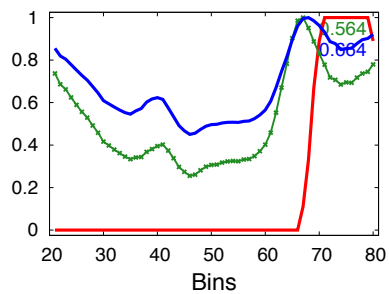*Kr\_CD2\_ru*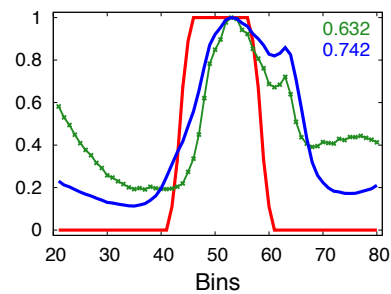

Supplement: pcbi.1000935.s004.pdf [file pcbi.1000935.s004.pdf]
