# Supplementary material for: Thermodynamics-Based Models of Transcriptional Regulation by Enhancers: The Roles of Synergistic Activation, Cooperative Binding and Short-Range Repression
Source: PubMed Central journal article supplement (PMC2940721; doi:10.1371/journal.pcbi.1000935), 2010-09-16

*btd\_head*

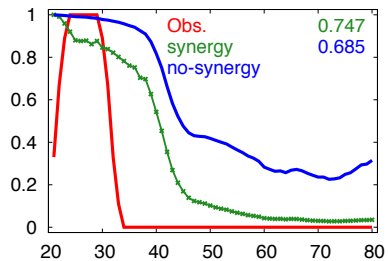

*eve\_stripe4\_6*

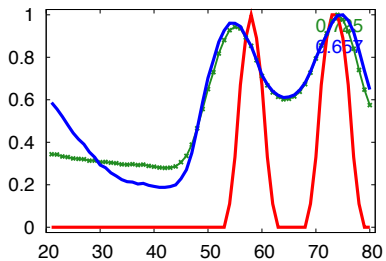

*hb\_anterior\_actv*

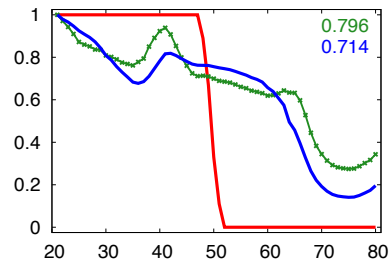

*kni\_83\_ru*

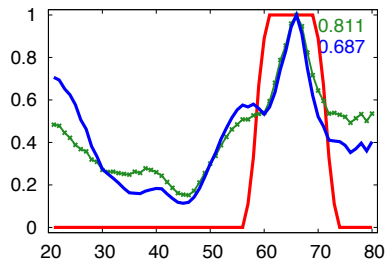

*oc\_(+7)*

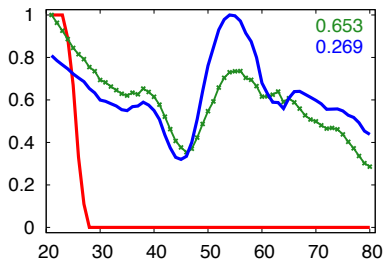

*oc\_otd\_early*

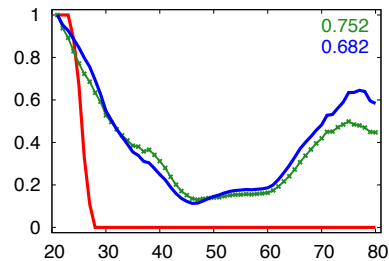

*pdm2\_(+1)*

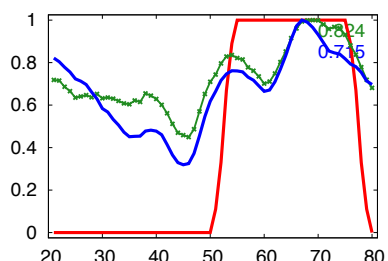

*slp2\_(-3)*

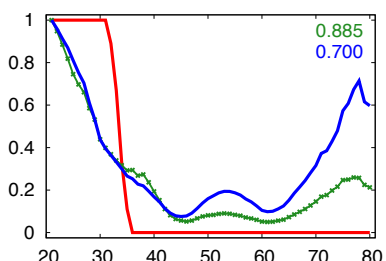

Supplement: pcbi.1000935.s005.pdf [file pcbi.1000935.s005.pdf]
