# Supplementary material for: Thermodynamics-Based Models of Transcriptional Regulation by Enhancers: The Roles of Synergistic Activation, Cooperative Binding and Short-Range Repression
Source: PubMed Central journal article supplement (PMC2940721; doi:10.1371/journal.pcbi.1000935), 2010-09-16

*gt\_(-1)*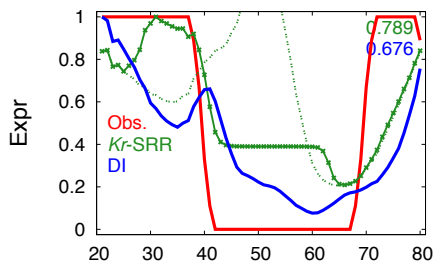*h\_6\_ru*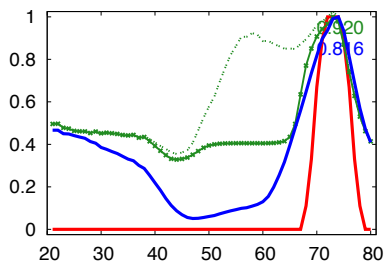*kni\_83\_ru*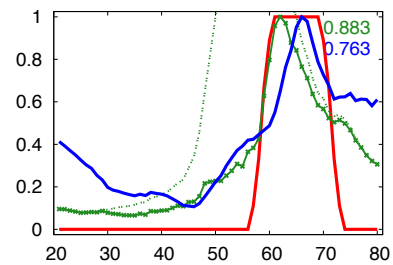*gt\_(-10)*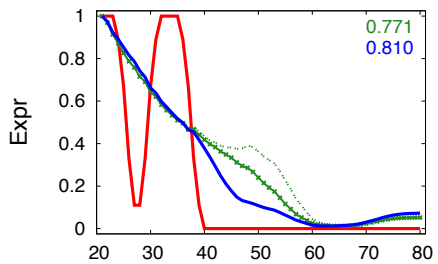*kni\_(+1)*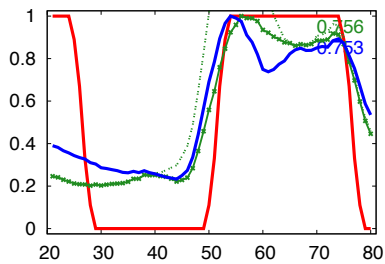*prd\_+4*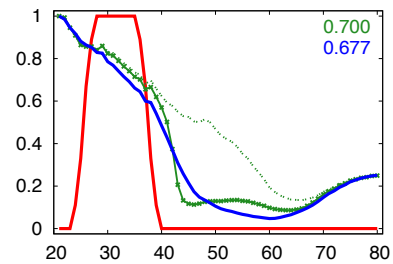*slp2\_(-3)*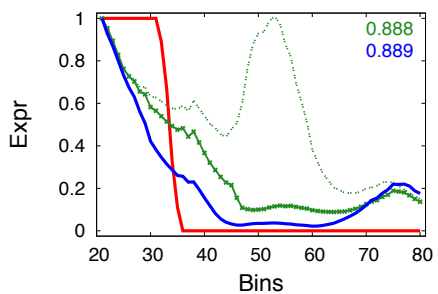

Supplement: pcbi.1000935.s007.pdf [file pcbi.1000935.s007.pdf]
