# Supplementary material for: Thermodynamics-Based Models of Transcriptional Regulation by Enhancers: The Roles of Synergistic Activation, Cooperative Binding and Short-Range Repression
Source: PubMed Central journal article supplement (PMC2940721; doi:10.1371/journal.pcbi.1000935), 2010-09-16

*eve\_stripe4\_6*

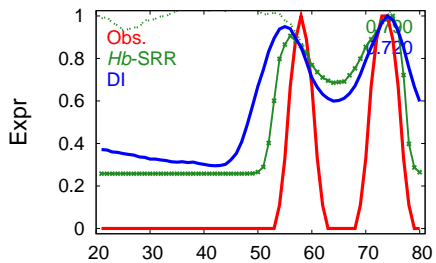

*knrl\_(+8)*

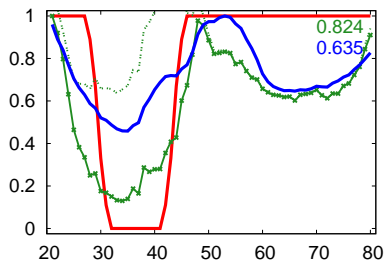

*Kr\_CD1\_ru*

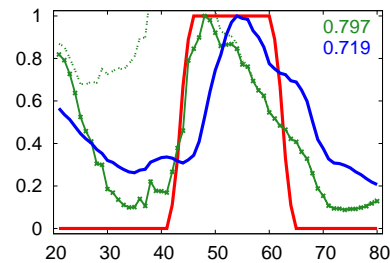

*oc\_(+7)*

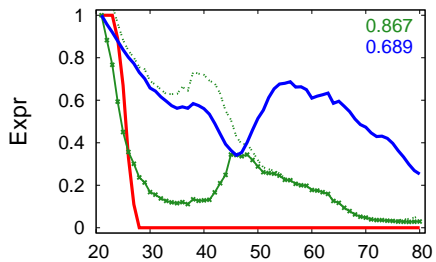

*oc\_otd\_early*

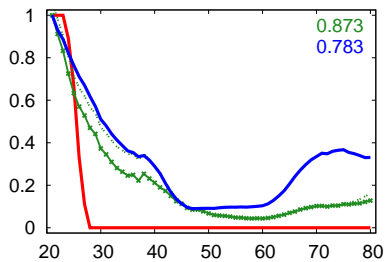

*gt\_(-1)*

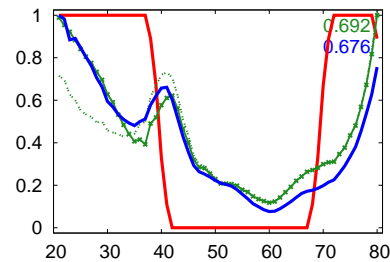

*h\_6\_ru*

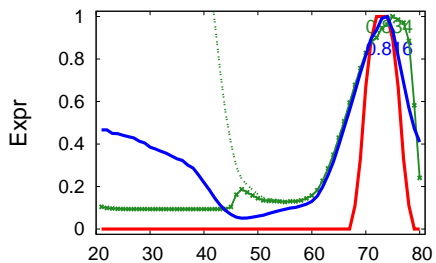

*kni\_(+1)*

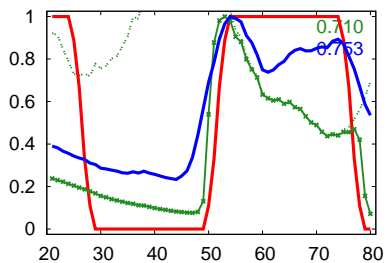

*kni\_83\_ru*

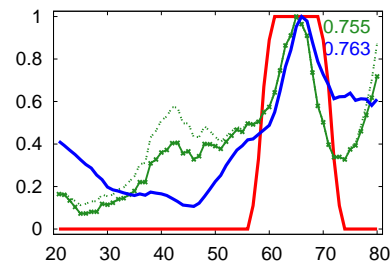

Supplement: pcbi.1000935.s008.pdf [file pcbi.1000935.s008.pdf]
